# Supplementary material
Source: Springer Nature journal article supplement (https://www.springermedizin.de/resource/supplementary/13020_2011_136_MOESM3_ESM.pdf/9641054)
Supplement: MOESM3 [file 9641054]

HQ265608 TTTGTGATATGGGAGAACGTGGGCACAGTCTCGAAAAGCATCAAAGCTAGCATCGAAGCCC 60  
Sample\_H -----CCC 3  
\*\*\*

HQ265608 GGAAGCTCGACTTTGATGCTTATGTTGGTATGTCACCTTGCCAAAGCACCTAGTTTGTG 120  
Sample\_H GGAAGCTCGACTTTGATGCTTATGTTGGTATGTCACCTTGCCAAAGCACCTAGTTTGTG 63  
\*\*\*\*\*

HQ265608 GTACTTGAAGAATTGGCAGAGCTATAATTTGTTGGTATAATATAGAGCAGTATCATTAGT 180  
Sample\_H GTACTTGAAGAATTGGCAGAGCTATAATTTGTTGGTATAATATAGAGCAGTATCATTAGT 123  
\*\*\*\*\*

HQ265608 GTTGATCGCCGAATATAGTAATATACTTCAGTATGTAGCAAATGCTTCATAAAAAACCA 240  
Sample\_H GTTGATCGCCGAATATAGTAATATACTTCAGTATGTAGCAAATGCTTCATAAAAAACCA 183  
\*\*\*\*\*

HQ265608 ACCTAGCTAGCAAAGAATCTGATCGATAAGTCAAATAATGCACAAGACCTACTGGACTGG 300  
Sample\_H ACCTAGCTAGCAAAGAATCTGATCGATAAGTCAAATAATGCACAAGACCTACTGGACTGG 243  
\*\*\*\*\*

HQ265608 ACTAAAAATATAATGTTACTTCATGTGCAAACATTTTTTGGTACCTTTTTCTAAAAGAAA 360  
Sample\_H ACTAAAAATATAATGTTACTTCATGTGCAAACATTTTTTGGTACCTTTTTCTAAAAGAAA 303  
\*\*\*\*\*

HQ265608 GAAGAGGGTGAGGGGTAGGCGAACCCACCCGGTTCATTGAGATAATGAGACAATTAGA 420  
Sample\_H GAAGAGGGTGAGGGGTAGGCGAACCCACCCGGTTCATTGAGATAATGAGACAATTAGA 363  
\*\*\*\*\*

HQ265608 TATGCTGAGTCTTATACATATCAGAATATCCATTCATTTTCTAGCACGTTTGGATTATTG 480  
Sample\_H TATGCTGAGTCTTATACATATCAGAATATCCATTCATTTTCTAGCACGTTTGGATTATTG 423  
\*\*\*\*\*

HQ265608 ATGGCTTATAGATTGCGACCCTGGCAGACCCACAGAAGCAATATGCTGATGTCGTAATTG 540  
Sample\_H ATGGCTTATAGATTGCGACCCTGGCAGACCCACAGAAGCAATATGCTGATGTCGTAATTG 483  
\*\*\*\*\*

HQ265608 AAGTTTACCGACACAATTAATTCCTGATGACAATGAAAGGAAGGTGCTGAGAGTTCGAT 600  
Sample\_H AAGTTTACCGACACAATTAATTCCTGATGACAATGAAAGGAAGGTGCTGAGAGTTCGAT 543  
\*\*\*\*\*

HQ265608 TGGTGATGAAAGAAGGGGTGAAGTACTTCAATCCGTTTACCTCTTCGACGAAGGCTCCA 660  
Sample\_H TGGTGATGAAAGAAGGGGTGAAGTACTTCAATCCGTTTACCTCTTCGACGAAGGCTCCA 603  
\*\*\*\*\*

HQ265608 CTGTTTCATGGATACCCTGCGGNAGGAAACTAAGCTGCTCATCCCC 706  
Sample\_H CTGTTTCATGGATACCCTGCGGTAGGAAACTAAGCTGCTCAT---- 645  
\*\*\*\*\*
